# Supplementary material for: Comparative Genomic Hybridization and Transcriptome Sequencing Reveal Genes with Gain in Acute Lymphoblastic Leukemia: JUP Expression Emerges as a Survival-Related Gene
Source: MDPI journal article supplement (doi:10.3390/diagnostics12112788), 2022-11-14
Supplement: s1 [file s1]

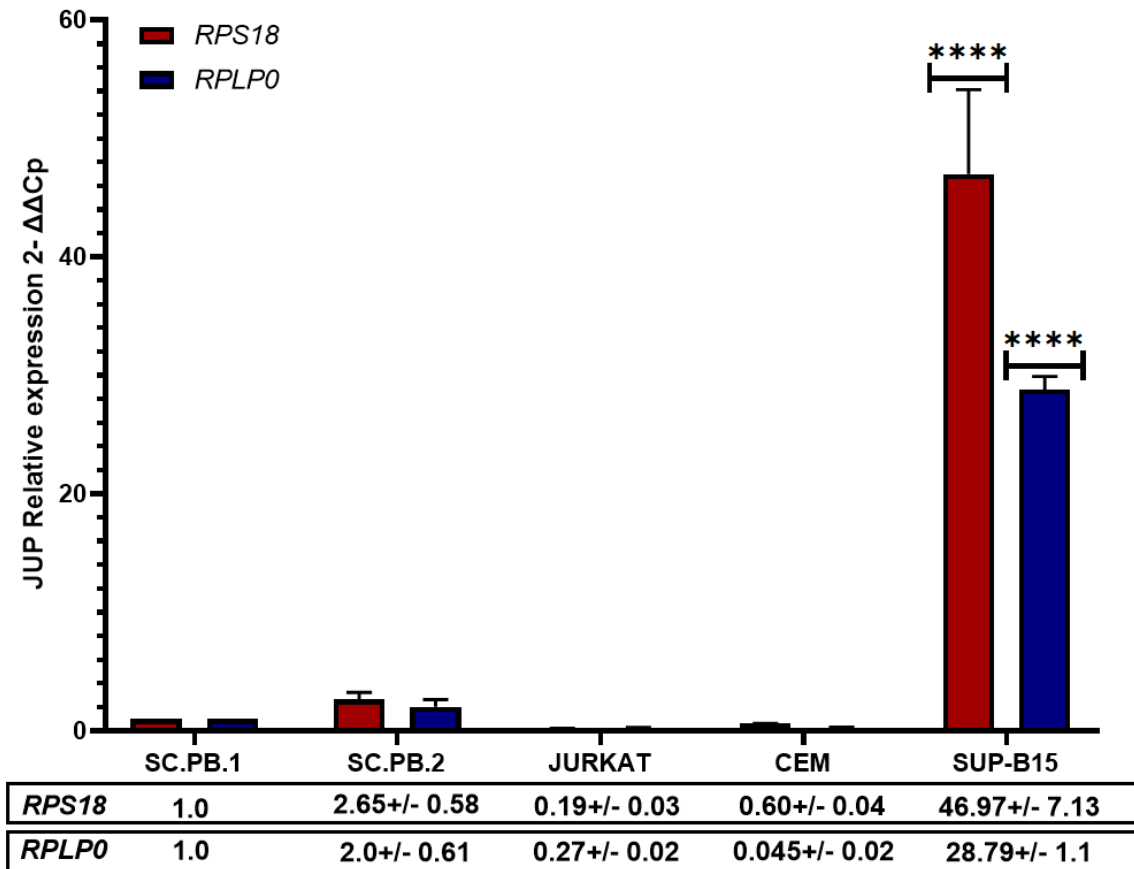

**Supplementary Figure S4. Relative expression of *JUP* in peripheral blood and leukemia-derived cell lines.** qPCR assays were used to determine mRNA levels tacking *RPLP0* and *RPS18* as reference genes. SC.PB.1 and SC.PB.2 are sample controls; the first was set as calibrator. The difference between all groups was calculated with a one-way ANOVA test. Asterisks indicate statistical significance ( $p < 0.0001$ ). An average and standard deviation of the Fold change obtained with the *RPS18* and *RPLP0* reference genes are depicted.
