# Supplementary material for: Comparative Genomic Hybridization and Transcriptome Sequencing Reveal Genes with Gain in Acute Lymphoblastic Leukemia: JUP Expression Emerges as a Survival-Related Gene
Source: MDPI journal article supplement (doi:10.3390/diagnostics12112788), 2022-11-14
Supplement: s1 [file s1]

**Supplementary Table S2. Data of DNA copy number normalized to Log2 of chromosomes 14, 17, and 22.** The values in yellow represent zones of the chromosome where we found a gain in T-ALL and B-ALL samples. Chr: chromosome, Start: starting position, End: finishing position, GSM: sample identifier.

| T-ALL Samples |          |          |            |            |            |            |            |            |            |            |            |
|---------------|----------|----------|------------|------------|------------|------------|------------|------------|------------|------------|------------|
| Chr           | Start    | End      | GSM1963457 | GSM1963456 | GSM1963455 | GSM1963454 | GSM1963453 | GSM1963452 | GSM1963451 | GSM1963450 | GSM1963449 |
| chr14         | 21444377 | 21444436 | 1.81E-01   | -2.79E-02  | 5.12E-01   | -1.35E-01  | 2.27E-01   | 1.52E-01   | -5.04E-01  | 2.85E-01   | 2.99E-01   |
| chr14         | 21646729 | 21646788 | 1.87E-01   | 4.59E-01   | -1.75E+00  | -3.99E-01  | -4.43E-01  | -2.28E-01  | 7.91E-02   | 4.11E-01   | 1.02E-01   |
| B-ALL Samples |          |          |            |            |            |            |            |            |            |            |            |
| Chr           | Start    | End      | GSM1963407 | GSM1963406 | GSM1963405 | GSM1963404 | GSM1963403 | GSM1963402 | GSM1963401 | GSM1963400 | GSM1963399 |
| chr14         | 21444377 | 21444436 | -4.46E-01  | 1.89E-01   | 7.96E-02   | 2.49E-01   | 4.30E-01   | -1.22E-01  | -4.25E-02  | -4.44E-01  | 4.81E-01   |
| chr14         | 21646729 | 21646788 | -2.74E-01  | 1.84E-01   | 7.18E-02   | 3.05E-01   | 5.66E-01   | 9.03E-02   | 3.54E-03   | -3.85E-01  | 2.78E-01   |
| T-ALL Samples |          |          |            |            |            |            |            |            |            |            |            |
| Chr           | Start    | End      | GSM1963457 | GSM1963456 | GSM1963455 | GSM1963454 | GSM1963453 | GSM1963452 | GSM1963451 | GSM1963450 | GSM1963449 |
| chr17         | 41755952 | 41756011 | -4.75E-01  | 3.78E-02   | 3.73E-01   | 3.19E-01   | -1.43E-02  | 4.11E-01   | 6.96E-01   | 1.57E-01   | 1.56E-01   |
| chr17         | 41788252 | 41788311 | 6.75E-02   | -1.44E-01  | 7.47E-01   | 3.61E-01   | 1.76E-02   | -1.60E-01  | 2.81E-01   | -2.25E-01  | 5.06E-01   |
| chr17         | 41819694 | 41819753 | -4.96E-01  | -1.87E-01  | 7.00E-01   | 3.95E-01   | -1.26E-01  | 5.49E-02   | 1.95E-01   | -3.12E-01  | 2.57E-01   |
| chr17         | 41854798 | 41854857 | -5.44E-01  | -6.43E-03  | 5.36E-01   | 5.25E-01   | 3.81E-01   | 1.64E-01   | 1.58E-01   | -5.98E-01  | -2.68E-01  |
| chr17         | 41876006 | 41876065 | -4.54E-01  | -3.51E-01  | 4.91E-01   | 3.46E-01   | 2.72E-01   | 7.99E-02   | 8.81E-02   | -6.14E-01  | -4.35E-02  |
| chr17         | 41958730 | 41958789 | -5.01E-01  | -2.22E-02  | 7.21E-02   | 2.60E-01   | 1.01E-01   | 4.05E-01   | 6.29E-01   | -5.55E-03  | 3.65E-01   |
| chr17         | 41999354 | 41999413 | -3.01E-01  | -2.59E-01  | 5.92E-01   | 4.25E-01   | 7.19E-02   | 2.35E-01   | 6.03E-01   | 9.03E-02   | 1.13E-01   |
| chr17         | 42005133 | 42005192 | -4.48E-01  | 9.57E-02   | 5.07E-01   | 6.10E-01   | 1.72E-01   | -1.97E-01  | 2.21E-01   | -3.51E-01  | 1.38E-01   |
| B-ALL Samples |          |          |            |            |            |            |            |            |            |            |            |
| Chr           | Start    | End      | GSM1963407 | GSM1963406 | GSM1963405 | GSM1963404 | GSM1963403 | GSM1963402 | GSM1963401 | GSM1963400 | GSM1963399 |
| chr17         | 41755952 | 41756011 | 1.55E-01   | -8.37E-02  | -4.26E-01  | -3.83E-01  | -2.01E-01  | 1.59E-04   | -6.93E-01  | -4.73E-01  | 6.89E-01   |
| chr17         | 41788252 | 41788311 | -1.03E-02  | 6.16E-01   | -1.17E-02  | -2.09E-01  | -1.83E-01  | 2.79E-01   | -2.55E-01  | -7.88E-04  | 4.83E-01   |
| chr17         | 41819694 | 41819753 | -3.70E-01  | 2.68E-01   | -2.53E-01  | 7.31E-02   | -2.95E-01  | -5.47E-01  | -6.98E-01  | -6.97E-01  | 9.96E-01   |
| chr17         | 41854798 | 41854857 | -5.97E-01  | 6.92E-02   | -5.82E-01  | -4.24E-01  | -5.48E-01  | -6.81E-01  | -8.59E-01  | -6.52E-01  | 1.14E+00   |
| chr17         | 41876006 | 41876065 | -7.22E-01  | 3.88E-01   | -6.13E-01  | 5.58E-03   | -2.76E-01  | -7.16E-01  | -6.07E-01  | -3.28E-01  | 1.17E+00   |
| chr17         | 41958730 | 41958789 | 8.66E-02   | -1.38E-02  | -1.79E-01  | -4.45E-01  | -5.39E-01  | -1.57E-01  | -5.68E-01  | -6.78E-01  | 4.61E-01   |

|               |          |          |            |            |            |            |            |            |            |            |            |
|---------------|----------|----------|------------|------------|------------|------------|------------|------------|------------|------------|------------|
| chr17         | 41999354 | 41999413 | 3.17E-01   | 2.21E-01   | -4.66E-01  | -4.39E-01  | -4.95E-01  | -4.38E-01  | -6.51E-01  | -2.05E-02  | 7.85E-01   |
| chr17         | 42005133 | 42005192 | -2.77E-02  | 4.13E-01   | -4.67E-01  | -2.91E-01  | -6.24E-01  | -3.66E-01  | -3.44E-01  | -5.14E-01  | 5.91E-01   |
| T-ALL Samples |          |          |            |            |            |            |            |            |            |            |            |
| Chr           | Start    | End      | GSM1963457 | GSM1963456 | GSM1963455 | GSM1963454 | GSM1963453 | GSM1963452 | GSM1963451 | GSM1963450 | GSM1963449 |
| chr22         | 20026630 | 20026689 | -2.16E-01  | -8.50E-01  | -1.96E+00  | -9.70E-01  | 1.14E-01   | 1.09E-01   | 1.22E-01   | -5.38E-01  | 2.08E-01   |
| chr22         | 20037371 | 20037430 | -7.03E-01  | -3.99E-01  | -8.94E-01  | -3.78E-01  | -7.05E-02  | 8.93E-01   | 3.28E-01   | -7.28E-01  | 1.65E-01   |
| B-ALL Samples |          |          |            |            |            |            |            |            |            |            |            |
| Chr           | Start    | End      | GSM1963407 | GSM1963406 | GSM1963405 | GSM1963404 | GSM1963403 | GSM1963402 | GSM1963401 | GSM1963400 | GSM1963399 |
| chr22         | 20026630 | 20026689 | -1.02E-01  | -3.15E-01  | -4.36E-01  | 2.37E-01   | 4.23E-01   | 5.49E-01   | 8.45E-02   | -8.78E-02  | -5.45E-01  |
| chr22         | 20037371 | 20037430 | 1.87E-01   | -1.16E-01  | -7.11E-01  | -7.12E-02  | 1.02E+00   | 3.05E-01   | -4.44E-01  | -6.37E-01  | -2.53E-01  |
