# Supplementary material for: Comparative Genomic Hybridization and Transcriptome Sequencing Reveal Genes with Gain in Acute Lymphoblastic Leukemia: JUP Expression Emerges as a Survival-Related Gene
Source: MDPI journal article supplement (doi:10.3390/diagnostics12112788), 2022-11-14
Supplement: s1 [file s1]

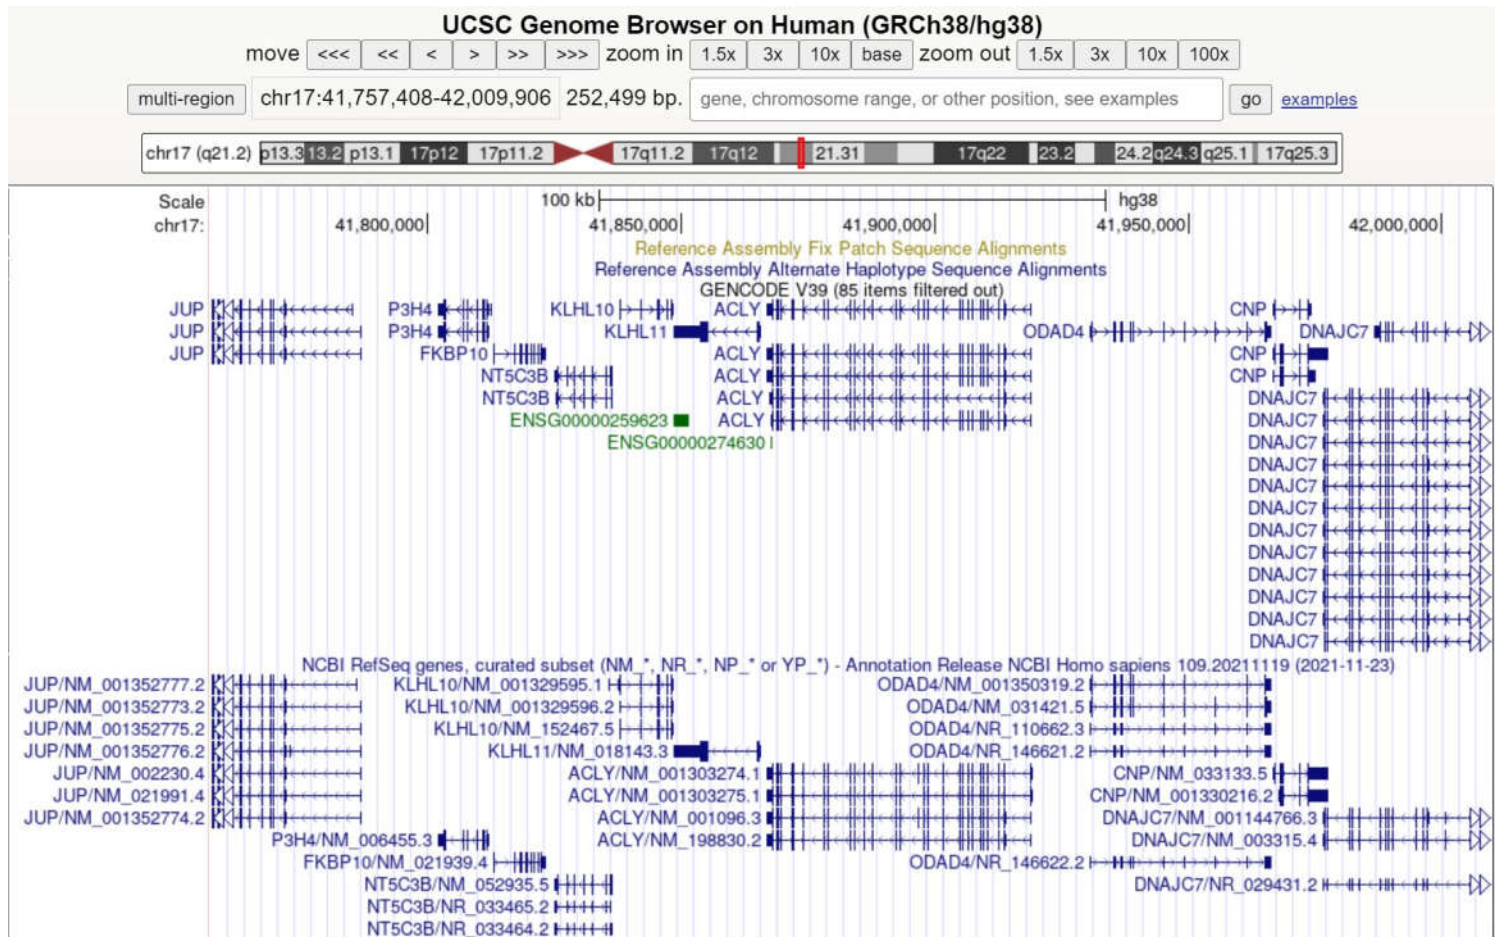

**Supplementary Figure S2. Genes present on the common gain region of chromosome 17, found between 41,757,408 to 42,009,906 base pairs of the genome, visualized with the UCSC Genome Browser.** The ten genes in blue are coding products with their respective isoforms, and in green are non-coding transcripts.
