# Supplementary material for: Comparative Genomic Hybridization and Transcriptome Sequencing Reveal Genes with Gain in Acute Lymphoblastic Leukemia: JUP Expression Emerges as a Survival-Related Gene
Source: Diagnostics (Basel). 2022 Nov 14;12(11):2788. doi: 10.3390/diagnostics12112788 (PMC9689318; doi:10.3390/diagnostics12112788)
Supplement: Supplementary file 1 [file diagnostics-12-02788-s001.zip]

Archive with 6 entries (6 files):
- Supplementary Figure  S3.pdf
- Supplementary Figure S1.pdf
- Supplementary Figure S2.pdf
- Supplementary Figure S4.pdf
- Supplementary Table S1.pdf
- Supplementary Table S2.pdf
